# Supplementary material
Source: Research Square preprint supplement (doi:10.21203/rs.3.rs-9204124/v1)
Supplement: Supplementary file 1 [file 2eb1a8b987159a41b4282449.xlsx]

## Sheet: Feuille1
Panel Data (First 100 observations)
country	year	region	cluster	gini	theil	p90_p10	digital_banking	account_access	credit_availability	electronic_payment	fi_index	employment_rate	unemployment_volatility	wage_dispersion	skill_polarization	gdp_growth	inflation	gfc_crisis	euro_crisis	covid_crisis	diffusion_coef	drift_coef
Germany	2000	Western	Core	0.2811	0.1875	5.33	0.1796	0.7413	68.4	0.1857	0.4755	70.9	0.72	3.79	1.24	0.21	1.66	0	0	0	0.023	-0.0121
Germany	2001	Western	Core	0.2719	0.1777	4.75	0.1485	0.7597	67.3	0.2094	0.4753	71.4	1.41	3.53	1.31	2.48	1.15	0	0	0	0.0277	-0.0142
Germany	2002	Western	Core	0.3102	0.2196	5.55	0.177	0.7509	66.9	0.2193	0.4805	71.7	1.1	3.6	1.18	2.7	2.47	0	0	0	0.0279	-0.0056
Germany	2003	Western	Core	0.293	0.1779	5.25	0.166	0.7886	71	0.1954	0.4946	71.1	1.14	3.8	1.33	2.39	2.8	0	0	0	0.0261	-0.0128
Germany	2004	Western	Core	0.298	0.1987	6.4	0.141	0.776	73	0.1645	0.4835	73.9	1.77	3.7	1.25	0.26	1.37	0	0	0	0.0274	-0.0106
Germany	2005	Western	Core	0.2816	0.1968	5.35	0.1488	0.7977	74.3	0.2242	0.5071	71.9	1.4	3.59	1.23	2.94	2.21	0	0	0	0.0249	-0.0104
Germany	2006	Western	Core	0.2808	0.1782	5.38	0.1752	0.8012	68.7	0.2114	0.4983	74.6	1.49	3.39	1.27	1.01	2.08	0	0	0	0.0237	-0.0123
Germany	2007	Western	Core	0.283	0.1811	5.35	0.1969	0.7885	79	0.2888	0.5411	74	1.23	3.86	1.27	3.38	3.75	0	0	0	0.0216	-0.0128
Germany	2008	Western	Core	0.3107	0.215	5.49	0.2094	0.8237	57.7	0.3184	0.5075	69.1	3.19	3.71	1.34	-4.83	1.71	1	0	0	0.0416	-0.0055
Germany	2009	Western	Core	0.3002	0.171	5.46	0.2411	0.8337	58.5	0.307	0.518	71	3.09	3.74	1.4	-4.52	2.19	1	0	0	0.0407	-0.0139
Germany	2011	Western	Core	0.2939	0.1982	4.99	0.4466	0.8234	81.2	0.639	0.6894	72.7	1.79	3.74	1.46	5.35	1.8	0	0	0	0.0208	-0.0179
Germany	2012	Western	Core	0.2715	0.1896	5.1	0.4768	0.8541	87.8	0.6473	0.7244	72.1	1.49	3.47	1.49	2.56	1.89	0	0	0	0.0224	-0.0094
Germany	2013	Western	Core	0.2702	0.1529	5.03	0.4889	0.8572	76.7	0.6843	0.7079	74.4	1.23	3.63	1.46	0.79	2.29	0	0	0	0.0246	-0.0073
Germany	2014	Western	Core	0.2844	0.1985	5.09	0.497	0.8659	81.3	0.7368	0.7345	75.8	1.5	3.85	1.53	2.85	2.14	0	0	0	0.0192	-0.0214
Germany	2015	Western	Core	0.2711	0.1775	5.86	0.4727	0.8803	77.2	0.7382	0.7228	75.6	1.52	3.45	1.46	3.52	1.42	0	0	0	0.0234	-0.0128
Germany	2016	Western	Core	0.2688	0.1952	5.4	0.5294	0.8846	85.9	0.7693	0.7665	73.9	1	3.49	1.6	2	1.75	0	0	0	0.0233	-0.0218
Germany	2017	Western	Core	0.2629	0.1847	5.74	0.5689	0.8632	82.1	0.8517	0.7769	73.7	1.63	3.7	1.49	2.41	-0.59	0	0	0	0.0192	-0.0149
Germany	2018	Western	Core	0.262	0.1935	5.49	0.5648	0.887	84.6	0.9137	0.8015	75.2	1.77	3.56	1.56	3.47	2.1	0	0	0	0.0163	-0.0077
Germany	2019	Western	Core	0.2881	0.158	5.26	0.5983	0.9062	83.3	0.8848	0.8067	74.3	1.32	3.79	1.6	1.46	2.72	0	0	0	0.0229	-0.0115
Germany	2020	Western	Core	0.283	0.1923	5.05	0.5699	0.8917	84	0.95	0.81	74.9	2.37	3.59	1.61	-5.48	2.74	0	0	1	0.0323	-0.0106
Germany	2021	Western	Core	0.2796	0.1798	5.27	0.6367	0.9057	93.1	0.95	0.8536	71.7	2.85	3.76	1.65	-4.56	1.99	0	0	1	0.0308	-0.0157
Germany	2022	Western	Core	0.2626	0.166	5.34	0.6562	0.9464	86.3	0.95	0.8537	76	1.76	3.76	1.62	1.5	5.09	0	0	0	0.0154	-0.0074
Germany	2023	Western	Core	0.2668	0.1584	5.13	0.6572	0.9388	85.9	0.95	0.8508	77.3	1.47	3.66	1.69	1.9	4.18	0	0	0	0.0215	-0.0149
Germany	2024	Western	Core	0.2598	0.203	5.2	0.6735	0.9699	92.8	0.95	0.8813	75.5	1.79	3.36	1.72	2.26	2.92	0	0	0	0.0243	-0.0247
Germany	2025	Western	Core	0.2677	0.2022	5.43	0.6897	0.9365	91.5	0.95	0.8721	77.9	1.85	3.53	1.61	4.53	3.91	0	0	0	0.025	-0.0238
France	2000	Western	Core	0.2952	0.1958	5.45	0.1841	0.7247	69.1	0.16	0.4681	70.4	1.66	3.84	1.28	1.26	1.76	0	0	0	0.026	0.0011
France	2001	Western	Core	0.3084	0.2015	6.09	0.1889	0.7243	73.7	0.2161	0.492	73.8	1.21	3.83	1.27	-0.14	1.05	0	0	0	0.019	-0.0116
France	2002	Western	Core	0.3037	0.1901	5.83	0.1734	0.741	71.6	0.2199	0.4885	72	1	3.71	1.26	4.18	0.85	0	0	0	0.0247	-0.0103
France	2003	Western	Core	0.2999	0.1809	5.25	0.1326	0.7431	75.3	0.1754	0.4793	73.1	1.34	3.58	1.25	0.95	1.56	0	0	0	0.0216	0.0002
France	2004	Western	Core	0.2963	0.2003	5.73	0.1708	0.7427	71	0.2145	0.4859	71.9	1.13	4.04	1.26	1.56	0.25	0	0	0	0.0277	-0.0145
France	2005	Western	Core	0.3196	0.2246	5.52	0.1346	0.7359	74.6	0.1811	0.4772	71	1.31	3.6	1.38	3.82	1.99	0	0	0	0.0297	-0.0101
France	2006	Western	Core	0.2871	0.18	5.77	0.1644	0.758	79	0.2023	0.5064	70.6	1.78	3.67	1.33	1.96	1.81	0	0	0	0.0236	-0.0126
France	2007	Western	Core	0.2883	0.1744	5.32	0.174	0.7801	75.4	0.264	0.519	72	1.33	3.78	1.37	1.03	2.08	0	0	0	0.0271	-0.0181
France	2008	Western	Core	0.3113	0.1939	5.19	0.2147	0.7429	60	0.2973	0.4861	68.4	3.24	3.56	1.37	0.68	0.71	1	0	0	0.0397	-0.0123
France	2009	Western	Core	0.3141	0.1955	5.76	0.205	0.7999	66.5	0.2782	0.5132	69.4	3.17	3.71	1.4	-4.41	2.07	1	0	0	0.0394	-0.0051
France	2010	Western	Core	0.307	0.1907	5.63	0.3934	0.7952	64.6	0.6009	0.6187	67.9	3.11	3.68	1.45	-3.88	3.04	1	0	0	0.0368	-0.0239
France	2011	Western	Core	0.2891	0.2131	5.41	0.4138	0.8204	72.2	0.6159	0.6532	74.6	1.06	3.84	1.44	1.88	2.51	0	0	0	0.0303	-0.0116
France	2012	Western	Core	0.29	0.1721	5.07	0.4668	0.822	78.6	0.6657	0.6929	75.3	1.37	3.61	1.41	3.95	2.78	0	0	0	0.0272	-0.0083
France	2013	Western	Core	0.2808	0.1639	4.71	0.485	0.8338	80.2	0.687	0.7094	72.6	2.23	3.66	1.47	3.59	2.38	0	0	0	0.0236	-0.0172
France	2014	Western	Core	0.2898	0.1682	5.88	0.4772	0.8335	80.9	0.7345	0.7186	77.1	1.66	3.58	1.47	4.11	1.53	0	0	0	0.0254	-0.0255
France	2015	Western	Core	0.2747	0.1591	5.1	0.5254	0.8361	77.5	0.7439	0.7247	73.9	0.69	3.62	1.49	3.54	3.48	0	0	0	0.0261	-0.0146
France	2016	Western	Core	0.2751	0.1789	5.25	0.4969	0.8502	80.5	0.8019	0.7408	74.3	1.55	4.01	1.46	4.58	-0.13	0	0	0	0.0164	-0.0198
France	2017	Western	Core	0.2803	0.1766	4.82	0.5133	0.8393	88.9	0.8434	0.771	76.1	1.72	3.47	1.51	3.23	1.02	0	0	0	0.0244	-0.0156
France	2018	Western	Core	0.279	0.1849	5.31	0.5803	0.8489	82.4	0.8316	0.7721	72.7	2.03	3.45	1.52	4.47	0.6	0	0	0	0.0245	-0.0215
France	2019	Western	Core	0.2643	0.1973	5.18	0.5639	0.8638	86.4	0.8891	0.7939	76.2	1.53	3.62	1.56	2.41	2.25	0	0	0	0.0169	-0.0208
France	2020	Western	Core	0.2939	0.1717	5.38	0.5517	0.8883	92	0.95	0.8244	72.4	2.66	3.92	1.68	-7.01	2.41	0	0	1	0.0333	-0.0122
France	2021	Western	Core	0.282	0.1837	5.41	0.5882	0.8908	84.5	0.95	0.8156	71.5	2.22	3.44	1.57	-3.92	1.24	0	0	1	0.0417	-0.0129
France	2022	Western	Core	0.2795	0.1908	4.78	0.621	0.8861	82.5	0.95	0.8174	74.9	1.57	3.67	1.62	5.46	3.96	0	0	0	0.0172	-0.0173
France	2023	Western	Core	0.2821	0.1979	5.44	0.6082	0.8931	87.7	0.95	0.8291	76.2	1.55	3.45	1.68	3.42	4.45	0	0	0	0.025	-0.0115
France	2024	Western	Core	0.2797	0.1589	5.22	0.6744	0.914	90.5	0.95	0.8592	77	1.48	3.57	1.72	0.39	4.4	0	0	0	0.0183	-0.0098
France	2025	Western	Core	0.2735	0.1712	5.62	0.6804	0.9355	85.5	0.95	0.8546	76.8	1.52	3.78	1.67	4.61	5.84	0	0	0	0.0204	-0.018
United Kingdom	2000	Western	Core	0.3516	0.2155	6.05	0.159	0.7679	67	0.1737	0.4723	69.7	1.14	3.69	1.23	2.25	1.34	0	0	0	0.0322	-0.0153
United Kingdom	2001	Western	Core	0.3403	0.2286	5.81	0.2141	0.7784	69.2	0.1844	0.497	71.5	1.31	4	1.29	1.64	1.33	0	0	0	0.0264	-0.0147
United Kingdom	2002	Western	Core	0.3431	0.2584	6.03	0.1482	0.7985	70.5	0.2146	0.4958	73	1.83	3.7	1.25	-0.12	0.99	0	0	0	0.0277	-0.0168
United Kingdom	2003	Western	Core	0.3329	0.2197	5.66	0.1888	0.8419	70.8	0.1878	0.5143	73.7	1.7	4.08	1.29	1.96	2.47	0	0	0	0.0282	-0.0078
United Kingdom	2004	Western	Core	0.3401	0.2362	6.18	0.152	0.8192	72.1	0.1792	0.4998	71.8	1.65	3.88	1.3	2.16	2	0	0	0	0.0275	-0.0194
United Kingdom	2005	Western	Core	0.3241	0.2219	5.79	0.2083	0.8154	74.7	0.2062	0.5246	74.6	1.47	3.81	1.33	2.78	1.64	0	0	0	0.0253	-0.0063
United Kingdom	2006	Western	Core	0.3258	0.1846	5.9	0.1752	0.8299	75.9	0.2219	0.5269	72.7	0.89	3.89	1.37	-0.05	1.67	0	0	0	0.021	-0.0127
United Kingdom	2007	Western	Core	0.3248	0.2218	5.67	0.1933	0.8168	78.2	0.2863	0.5462	72.9	2.05	3.61	1.26	1.46	1.96	0	0	0	0.0253	-0.0134
United Kingdom	2008	Western	Core	0.3498	0.2285	5.73	0.2434	0.8389	62.9	0.3043	0.5307	70.5	2.93	3.96	1.4	-2.81	2.49	1	0	0	0.0369	-0.0115
United Kingdom	2009	Western	Core	0.3476	0.2366	5.75	0.273	0.8419	67.6	0.339	0.5576	68.6	3.04	3.74	1.42	-4.48	1.64	1	0	0	0.0338	-0.0158
United Kingdom	2010	Western	Core	0.3256	0.227	5.28	0.4364	0.8672	62.9	0.5607	0.6387	70.2	2.88	4.14	1.4	-2.71	3.43	1	0	0	0.036	-0.0139
United Kingdom	2011	Western	Core	0.321	0.2044	6.11	0.4616	0.8594	80.5	0.645	0.7035	74.8	1.52	3.67	1.45	3.09	2.72	0	0	0	0.0249	-0.0099
United Kingdom	2012	Western	Core	0.3237	0.2121	5.87	0.4646	0.8958	80.8	0.6996	0.7268	73.4	1.56	3.62	1.41	3.43	2.9	0	0	0	0.0316	-0.0162
United Kingdom	2013	Western	Core	0.3273	0.2145	5.8	0.4679	0.8801	75.4	0.69	0.7075	74.7	1.36	4.02	1.4	0.3	2.18	0	0	0	0.0261	-0.0071
United Kingdom	2014	Western	Core	0.3223	0.185	5.41	0.5242	0.8947	82.8	0.6837	0.7432	75.8	1.73	3.83	1.45	2.99	1.77	0	0	0	0.0176	-0.0162
United Kingdom	2015	Western	Core	0.3312	0.1725	5.99	0.4932	0.8946	78.6	0.7176	0.7318	75.6	1.36	3.85	1.5	3.22	2.06	0	0	0	0.0188	-0.0112
United Kingdom	2016	Western	Core	0.32	0.2178	5.14	0.531	0.9158	85.3	0.8156	0.784	75.9	1.47	3.81	1.58	2.05	2.3	0	0	0	0.0212	-0.0194
United Kingdom	2017	Western	Core	0.3288	0.2145	5.85	0.566	0.9172	77.6	0.8429	0.7792	75	1.8	3.35	1.64	2.29	2.89	0	0	0	0.0191	-0.014
United Kingdom	2018	Western	Core	0.3136	0.208	5.31	0.6089	0.9215	86	0.8321	0.8102	74.7	2.1	3.89	1.58	1.83	2.05	0	0	0	0.0225	-0.0146
United Kingdom	2019	Western	Core	0.3261	0.1948	6.1	0.5843	0.9365	82.9	0.8884	0.8121	75.2	1.6	3.84	1.66	3.18	1.8	0	0	0	0.0248	-0.0116
United Kingdom	2020	Western	Core	0.3182	0.2176	5.74	0.6528	0.9361	86.4	0.95	0.8499	71.5	2.01	3.62	1.68	-7.83	1.76	0	0	1	0.0296	-0.0209
United Kingdom	2021	Western	Core	0.3401	0.2362	5.51	0.6918	0.9627	85.8	0.95	0.8663	75.9	2.08	3.57	1.67	-1.84	3.11	0	0	1	0.035	-0.0164
United Kingdom	2022	Western	Core	0.3248	0.2073	5.72	0.6628	0.9643	87.5	0.95	0.8637	74.3	1.2	3.92	1.61	-0.37	4.32	0	0	0	0.0259	-0.0147
United Kingdom	2023	Western	Core	0.3091	0.1976	5.64	0.667	0.9656	84.4	0.95	0.8574	75.8	1.02	3.79	1.66	3.33	4.18	0	0	0	0.0255	-0.017
United Kingdom	2024	Western	Core	0.3126	0.2213	5.62	0.7005	0.978	90.7	0.95	0.8853	77	1.41	3.7	1.72	3.62	3.44	0	0	0	0.0236	-0.0211
United Kingdom	2025	Western	Core	0.3096	0.2054	5.23	0.7689	0.9622	90.9	0.95	0.8982	76.2	1.44	3.71	1.7	2.28	4.77	0	0	0	0.0276	-0.0212
Netherlands	2000	Western	Core	0.269	0.1796	5.15	0.1808	0.8084	65.7	0.1522	0.4824	73.2	1.83	3.65	1.17	0.07	2.45	0	0	0	0.0219	-0.0117
Netherlands	2001	Western	Core	0.2793	0.17	5.3	0.1414	0.833	73.3	0.1502	0.4985	72.6	1.87	3.46	1.3	3.13	1.44	0	0	0	0.0248	-0.0061
Netherlands	2002	Western	Core	0.2786	0.1662	5.42	0.1542	0.8372	76.4	0.1923	0.5191	73.9	1.14	3.56	1.17	2.61	2.62	0	0	0	0.025	-0.0032
Netherlands	2003	Western	Core	0.2785	0.1764	5.27	0.1695	0.8546	75.3	0.1804	0.523	70.9	0.95	3.71	1.2	-0.73	2.31	0	0	0	0.0322	-0.0094
Netherlands	2004	Western	Core	0.2827	0.178	5.4	0.1637	0.8695	74.9	0.215	0.532	72	1.43	3.47	1.26	0.95	3.05	0	0	0	0.0248	-0.0089
Netherlands	2005	Western	Core	0.2748	0.1909	5.62	0.1837	0.8602	70.1	0.1734	0.5138	72.4	1.32	3.6	1.3	3.29	1.94	0	0	0	0.0263	-0.0087
Netherlands	2006	Western	Core	0.2582	0.1721	4.83	0.204	0.8488	71.9	0.2454	0.5345	72.1	1.48	3.49	1.3	1.95	1.43	0	0	0	0.0256	-0.0117
Netherlands	2007	Western	Core	0.2743	0.1783	5.33	0.2377	0.8902	71.1	0.2062	0.5456	74.2	1.09	3.59	1.28	-0.2	2.43	0	0	0	0.0268	-0.0125
Netherlands	2009	Western	Core	0.2653	0.1642	5.24	0.2257	0.8948	62.2	0.3545	0.5511	70.5	2.71	3.78	1.37	-3.54	1.25	1	0	0	0.0382	-0.0137
Netherlands	2010	Western	Core	0.2666	0.1666	4.87	0.403	0.9043	63.6	0.6036	0.6518	69.2	2.52	3.54	1.4	-2.12	3.13	1	0	0	0.0421	-0.01
Netherlands	2011	Western	Core	0.2754	0.1795	4.98	0.4784	0.8978	84.8	0.6134	0.7237	73.2	1.56	3.42	1.37	4.3	1.47	0	0	0	0.0196	-0.0106
Netherlands	2012	Western	Core	0.2703	0.1651	4.93	0.5075	0.9251	83.5	0.6137	0.736	73.2	1.58	3.47	1.47	4.34	1.53	0	0	0	0.0228	-0.006
Netherlands	2013	Western	Core	0.2814	0.191	5.57	0.5033	0.9114	77.3	0.6308	0.7186	76.4	1.17	3.61	1.45	2.96	2.65	0	0	0	0.0254	-0.0164
Netherlands	2014	Western	Core	0.2727	0.1651	5.55	0.5285	0.9453	83.4	0.689	0.762	74.7	1.6	3.62	1.48	2.37	2.65	0	0	0	0.0241	-0.0137
Netherlands	2015	Western	Core	0.2531	0.1691	5.54	0.5568	0.979	83.7	0.706	0.7833	75.2	1.61	3.75	1.53	2.29	1.02	0	0	0	0.0215	-0.0176
Netherlands	2016	Western	Core	0.2661	0.1519	5.34	0.6016	0.9403	79.5	0.7919	0.7896	76.1	1.07	3.43	1.5	1.27	1.35	0	0	0	0.0158	-0.0112
Netherlands	2017	Western	Core	0.2657	0.1514	4.6	0.5629	0.9749	81.9	0.884	0.8149	73.9	1.56	3.83	1.64	5.59	2.97	0	0	0	0.0249	-0.0116
Netherlands	2018	Western	Core	0.2619	0.1899	5.43	0.6011	0.9782	86.4	0.7857	0.817	75.7	1.37	3.45	1.52	2.3	2.38	0	0	0	0.0177	-0.0135
Netherlands	2019	Western	Core	0.2656	0.191	5.3	0.6303	0.9576	84.1	0.9172	0.8385	77.1	1.96	3.52	1.52	2.71	0.59	0	0	0	0.0226	-0.0158
Netherlands	2020	Western	Core	0.2763	0.1766	5.1	0.6635	0.9771	90.2	0.95	0.8744	72.9	2.56	3.57	1.46	-5.74	2.72	0	0	1	0.0356	-0.0145
Netherlands	2021	Western	Core	0.2582	0.1793	5.43	0.6742	0.9849	84.2	0.95	0.8644	72.9	2.61	3.71	1.58	-3.26	1.78	0	0	1	0.0333	-0.0189
Netherlands	2022	Western	Core	0.2588	0.1513	4.54	0.6764	0.99	87.9	0.95	0.8757	75.4	1.47	3.49	1.68	1.12	3.11	0	0	0	0.0229	-0.0221
Netherlands	2023	Western	Core	0.2763	0.1554	5.56	0.7029	0.99	89	0.95	0.8852	74.2	1.52	3.69	1.69	2.76	3.71	0	0	0	0.0187	-0.0161
